# Supplementary material for: First demonstration of effective spatial training for near transfer to spatial performance and far transfer to a range of mathematics skills at 8 years
Source: PubMed Central journal article supplement (PMC7379338; doi:10.1111/desc.12909), 2019-11-06
Supplement: DESC-23-e12909-s001.pdf [file DESC-23-e12909-s001.pdf]

## Supplementary material

### Assessing training effects using ANCOVA analysis

As outlined in the results section, one-way ANCOVAs with baseline performance as a covariate were also completed to explore training effects. ANCOVAs were completed for each task in the test battery. Training mode (2 levels: explicit, implicit) and training type (3 levels: mental rotation, spatial scaling, literacy) were included as between participant variables. Post-training scores (Time 2) were included as the dependent variable and pre-training scores (Time 1) were included as a covariate.

Consistent with the MANOVA results reported in the main manuscript, there was a main effect of training type for: the Mental Rotation Task,  $F(2,236) = 4.96, p = .008, \eta_p^2 = .040$ ; the Spatial Scaling task,  $F(2,231) = 12.09, p < .001, \eta_p^2 = .094$ ; Missing Term Problems,  $F(2, 208) = 3.85, p = .023, \eta_p^2 = .036$ ; PAE scores on the Number Line Estimation Task,  $F(2,236) = 7.29, p = .001, \eta_p^2 = .058$ , and; Geometry Shape Items,  $F(1,218) = 4.91, p = .008, \eta_p^2 = .043$ . Consistent with the results reported in the main manuscript, there was no main effect of training type for Geometry Symmetry Items,  $F(2,212) = 0.55, p = .877, \eta_p^2 = .005$ .

To further explore the main effects of training type, bonferroni comparisons were used to compare performance at Time 2 across training types. For the Mental Rotation Task, pairwise comparisons demonstrated that those who completed mental rotation training had significantly higher scores at Time 2 than those who completed control training ( $p = .006$ ). The mental rotation training group also had higher scores than those who completed spatial scaling training, although this difference was not significant ( $p = .305$ ). There was no significant difference in performance between those who completed spatial scaling and control training ( $p = .397$ ). For the Spatial Scaling Task, pairwise comparisons indicated that performance at Time 2 was significantly higher for those who completed spatial scaling training compared to those who completed mental rotation training ( $p < .001$ ) or control training ( $p < .001$ ). There was no significant difference in performance between those who completed mental rotation and control training ( $p = 1.00$ ).

For Missing Term Problems, pairwise comparisons indicated that those who completed mental rotation training had higher performance scores than those who completed spatial

scaling training ( $p = .032$ ) or control training ( $p = .085$ ). There was no significant difference in performance between those who completed spatial scaling and control training ( $p = 1.00$ ). For PAE scores on the Number Line Estimation Task, error scores were significantly lower after spatial scaling training compared to mental rotation training ( $p = .036$ ) and control training ( $p < .001$ ). Error scores were lower, although not significantly, for the mental rotation training group compared to the control training group ( $p = .085$ ). Finally, for the Geometry Shape Items, performance was significantly higher following both mental rotation training ( $p = .024$ ) and spatial scaling training ( $p = .019$ ) compared to control training. There was no significant difference in performance between the mental rotation and spatial scaling training groups ( $p = 1.00$ )

For training mode, there was a significant main effect for Geometry Shape Items,  $F(2,212) = 0.55$ ,  $p = .877$ ,  $\eta_p^2 = .005$ . This favoured implicit instruction. No other main effects of training mode were found for: the Mental Rotation Task,  $F(1,236) = 0.01$ ,  $p = .969$ ,  $\eta_p^2 = .001$ ; the Spatial Scaling task,  $F(1,231) = 2.28$ ,  $p = .133$ ,  $\eta_p^2 = .010$ ; Missing Term Problems,  $F(1, 208) = 2.43$ ,  $p = .120$ ,  $\eta_p^2 = .012$ , Geometry Symmetry Items,  $F(2,212) = 0.15$ ,  $p = .701$ ,  $\eta_p^2 = .001$ , and; PAE scores on the Number Line Estimation Task,  $F(1,236) = 2.99$ ,  $p = .085$ ,  $\eta_p^2 = .013$ . There were no significant interactions between training type and training mode for any task ( $p$ 's  $> .391$ ;  $\eta_p^2$ 's  $< .008$ ).
